# Supplementary material for: Cancer Genes Hypermethylated in Human Embryonic Stem Cells
Source: PubMed Central journal article supplement (PMC2546447; doi:10.1371/journal.pone.0003294), 2008-09-29

Figure S2

Class B-I: *MGMT*

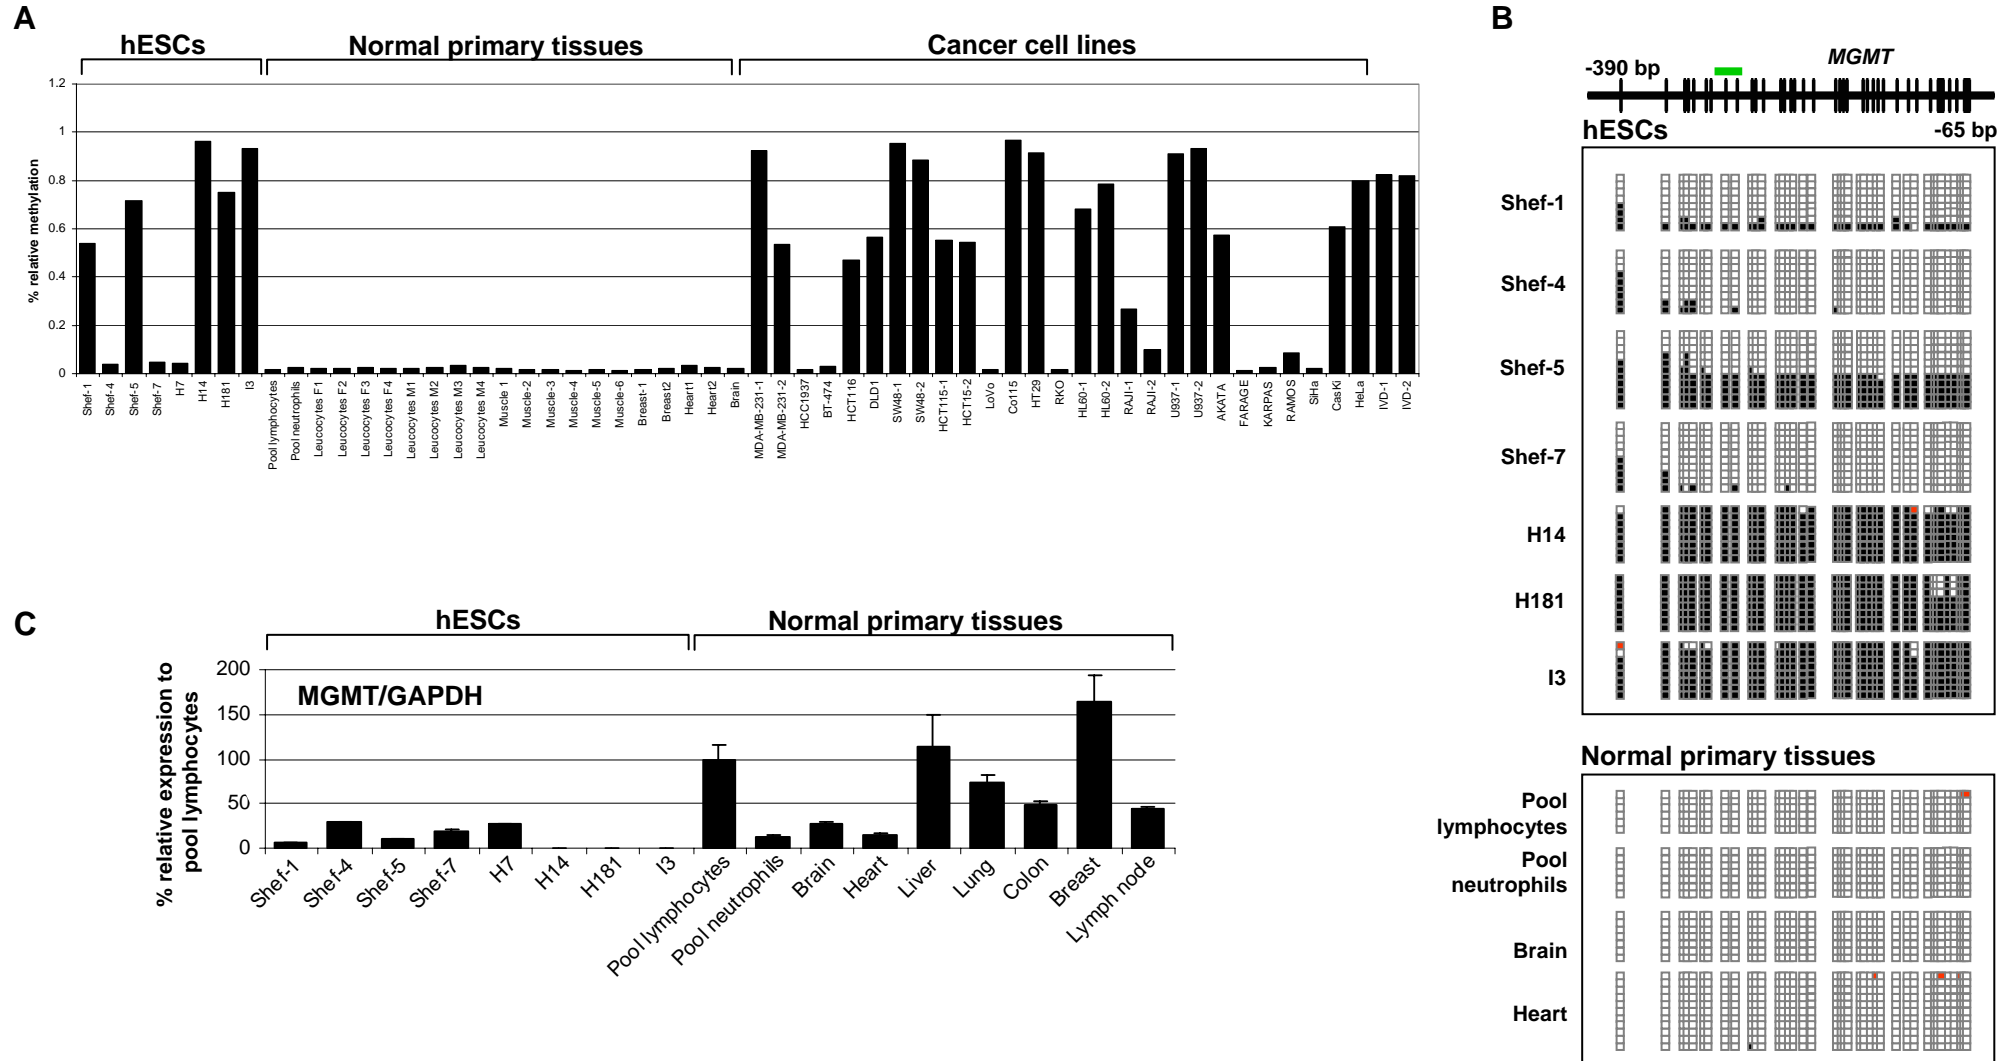

Supplement: pone.0003294.s002.pdf [file pone.0003294.s002.pdf]
