# Supplementary material for: Cancer Genes Hypermethylated in Human Embryonic Stem Cells
Source: PubMed Central journal article supplement (PMC2546447; doi:10.1371/journal.pone.0003294), 2008-09-29

Figure S6

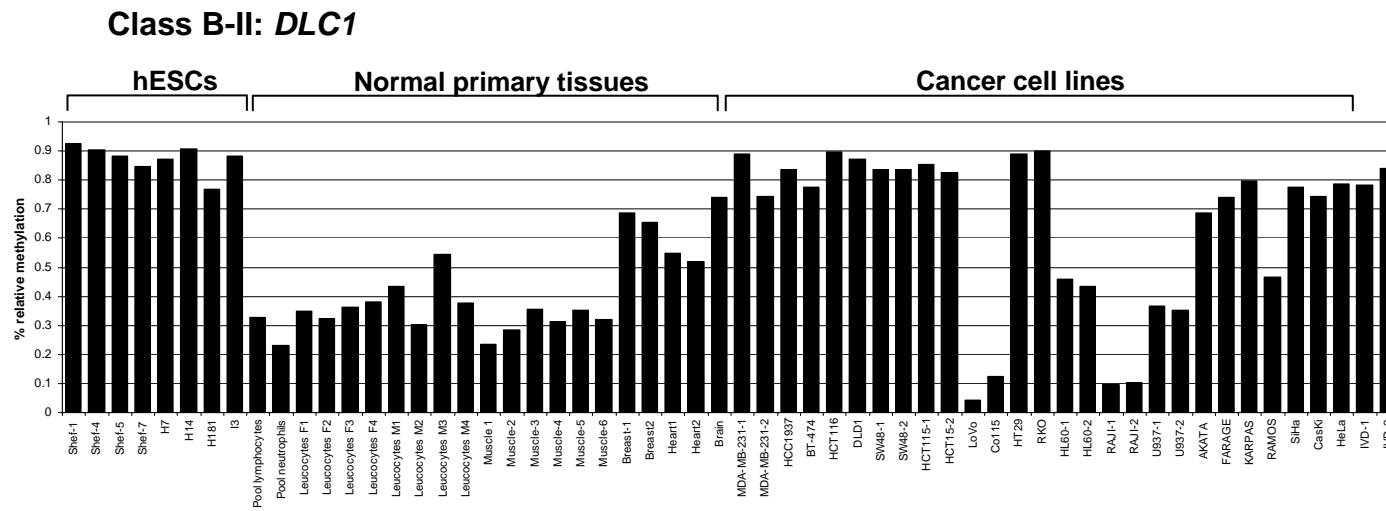

Supplement: pone.0003294.s006.pdf [file pone.0003294.s006.pdf]
